# Supplementary material for: Necrostatin-1 Alleviates Diffuse Pulmonary Haemorrhage by Preventing the Release of NETs via Inhibiting NE/GSDMD Activation in Murine Lupus
Source: Hindawi journal article supplement (doi:10.1155/2023/4743975), 2023-03-01
Supplement: f1 [file 4743975.f1.pdf]

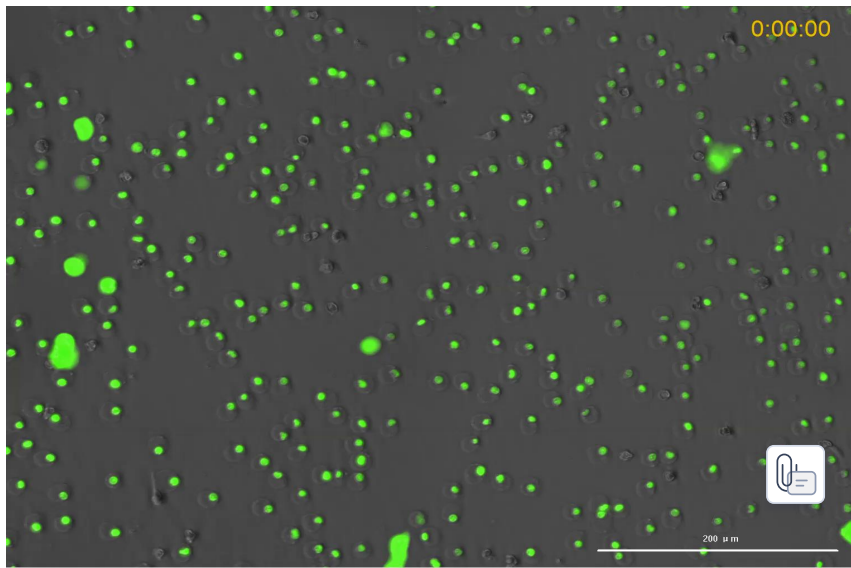

Control

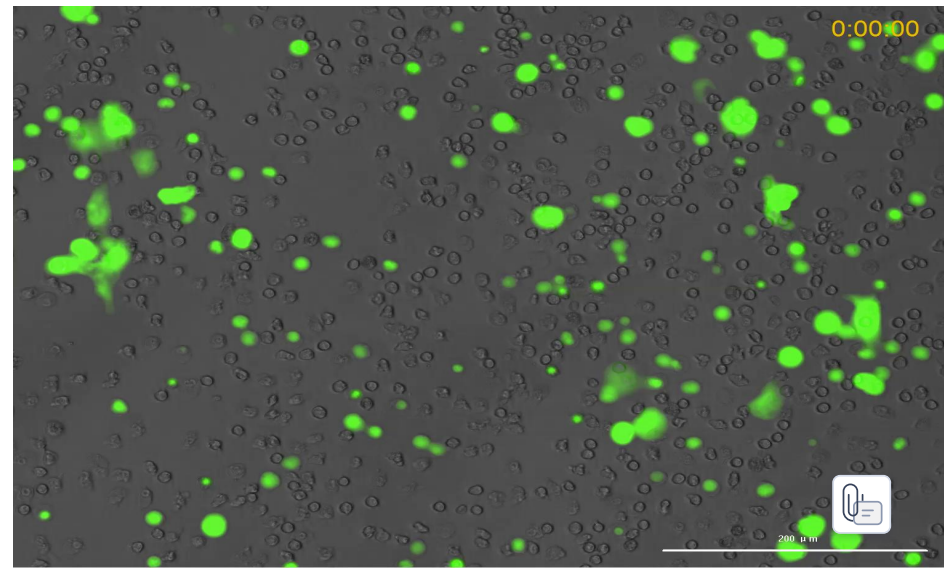

PMA

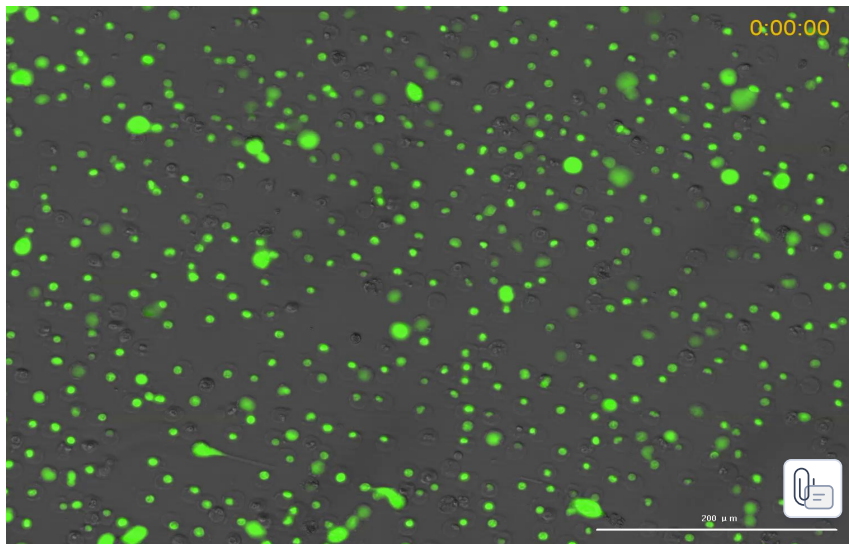

PMA+Nec-1 50  $\mu$ mol

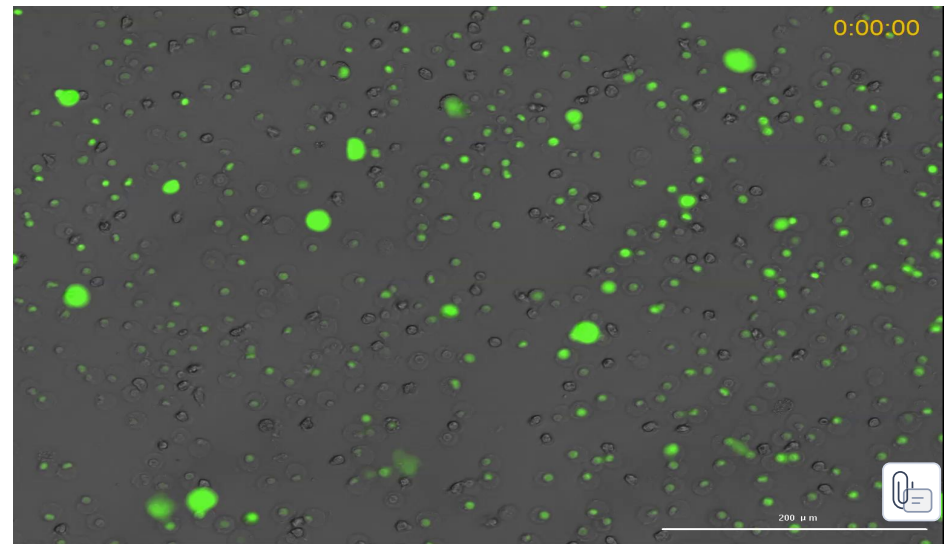

PMA+Nec-1 100  $\mu$ mol
